# Supplementary material for: High molecular weight polyethylenimine encapsulated into a porous polymer monolithic by one-step polymerization for CO2 capture
Source: Royal Society of Chemistry journal article supplement (doi:10.1039/d1nj01288f), 2021-01-01
Supplement: d1nj01288f1.pdf [file d1nj01288f1.pdf]

## Supporting information

### **High molecular weight polyethylenimine encapsulated into porous polymer monolithic by one-step polymerization for CO<sub>2</sub> capture**

Shuoyu Wang<sup>a,b</sup>, Jingjie Wu<sup>a,b</sup>, Nianfang Ma<sup>c</sup>, Shuixia Chen<sup>a,b\*</sup>

<sup>a</sup>*PCFM Lab, School of Chemistry, Sun Yat-Sen University, Guangzhou 510275, PR China*

<sup>b</sup>*Materials Science Institute, Sun Yat-Sen University, Guangzhou 510275, PR China*

<sup>c</sup>*Institute of Bioengineering, Guangdong Academy of Sciences; Guangdong Provincial  
Engineering Technology Research Center of Biomaterials, Guangzhou 510316, China*

---

\* Corresponding author. *E-mail address:* [cescsx@mail.sysu.edu.cn](mailto:cescsx@mail.sysu.edu.cn)

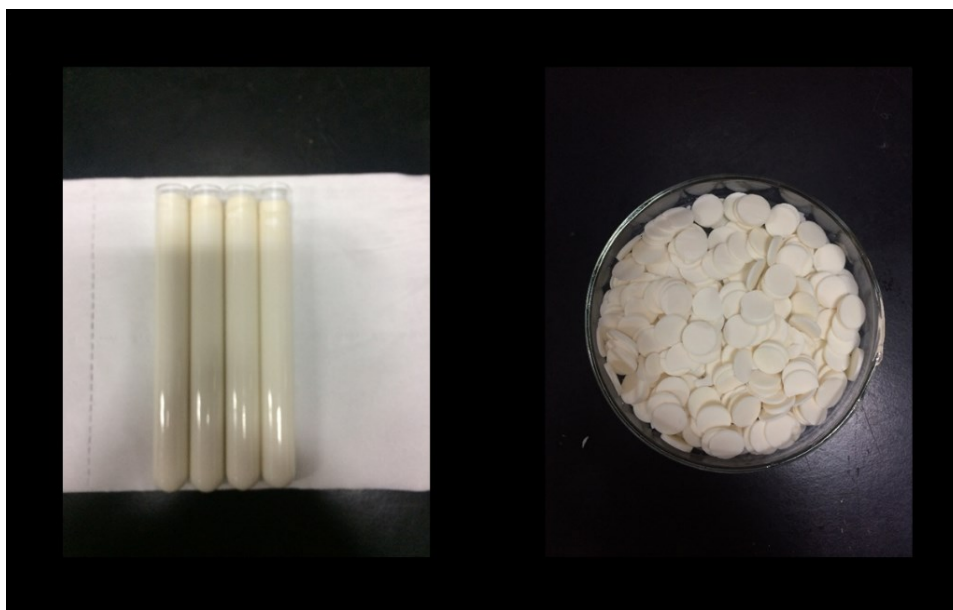

**Figure S1.** 4.0gPEI70K@polyHIPE monolithic columns and regular pellet samples

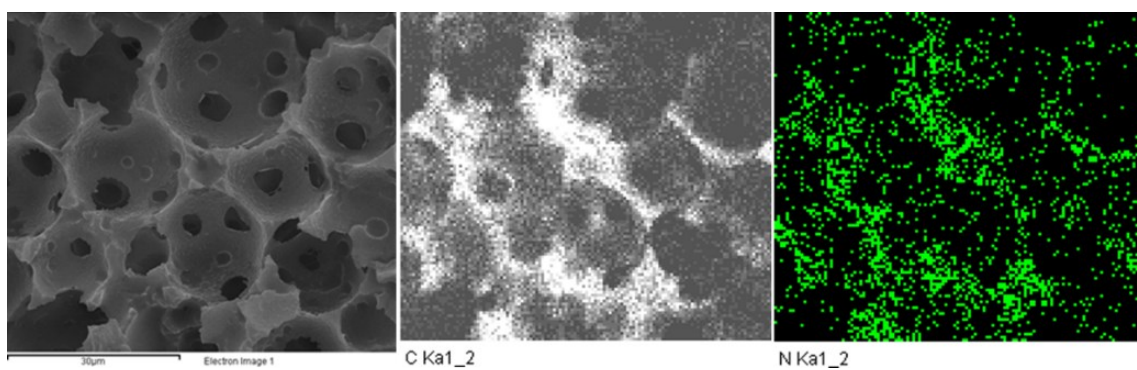

**Figure S2.** SEM and EDS of the sample 4.0PEI70k@polyHIPE

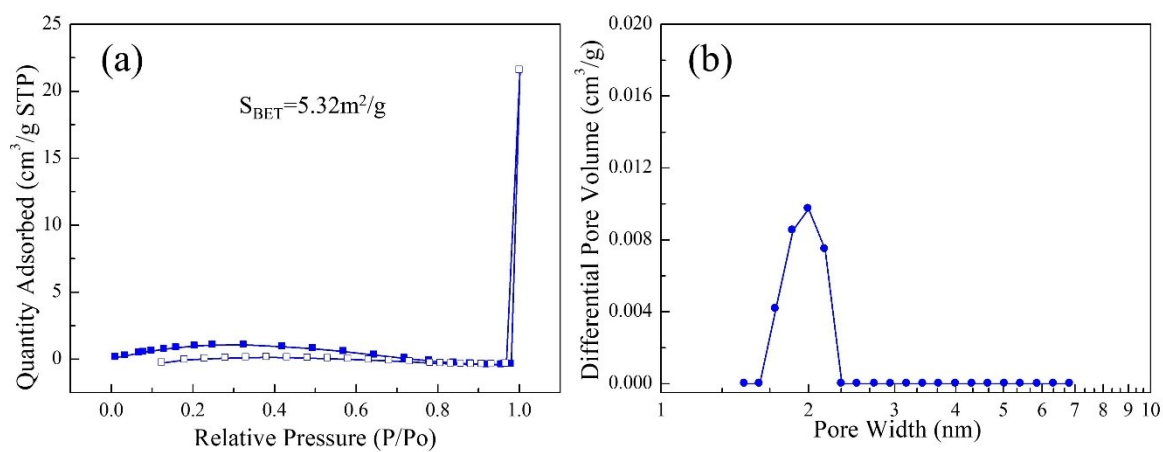

**Figure S3.** N<sub>2</sub> adsorption-desorption isotherms (a) and pore size distributions (b) of polyHIPE-50%PEI70K.

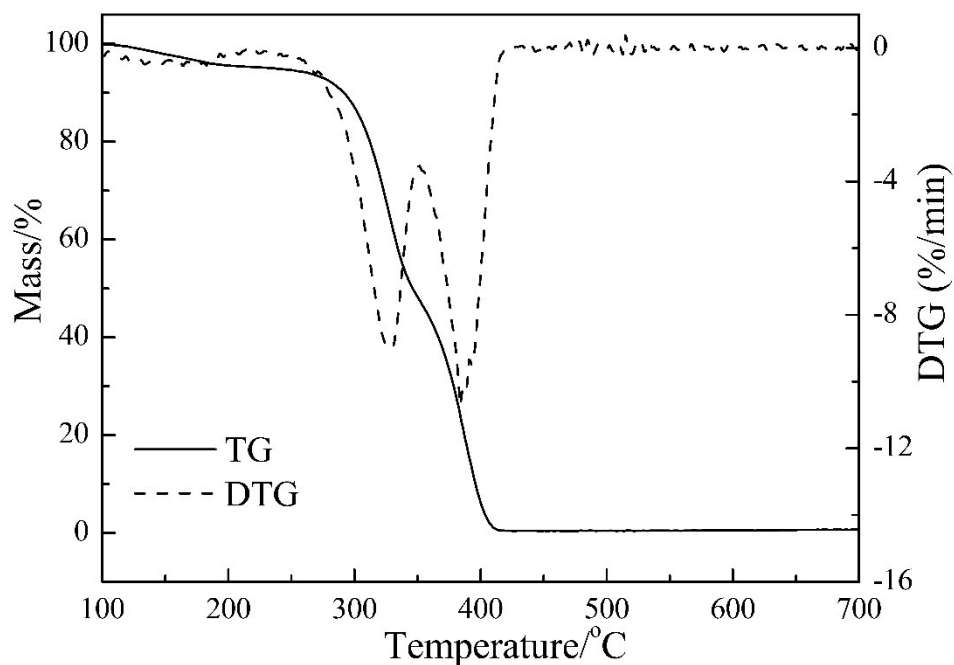

**Figure S4.** TG and DTG curves of pure PEI70K.

**Table S1.** Emulsions compositions.

| Sample             | Continuous phase |        |            |          | Aqueous phase        |         |         |
|--------------------|------------------|--------|------------|----------|----------------------|---------|---------|
|                    | St[g]            | DVB[g] | Span 80[g] | AIBME[g] | H <sub>2</sub> O[mL] | NaCl[g] | PEI*[g] |
| polyHIPE           | 2.00             | 2.50   | 1.00       | 0.10     | 26.50                | 0.55    | 0.00    |
| 0.5PEI70K@polyHIPE | 2.00             | 2.50   | 1.00       | 0.10     | 26.00                | 0.55    | 1.00    |

|                    |      |      |      |      |       |      |       |
|--------------------|------|------|------|------|-------|------|-------|
| 1.0PEI70K@polyHIPE | 2.00 | 2.50 | 1.00 | 0.10 | 25.50 | 0.55 | 2.00  |
| 2.0PEI70K@polyHIPE | 2.00 | 2.50 | 1.00 | 0.10 | 24.50 | 0.55 | 4.00  |
| 4.0PEI70K@polyHIPE | 2.00 | 2.50 | 1.00 | 0.10 | 22.50 | 0.55 | 8.00  |
| 8.0PEI70K@polyHIPE | 2.00 | 2.50 | 1.00 | 0.10 | 18.50 | 0.55 | 16.00 |

\* 50%wt aqueous solution of PEI70K

**Table S2.** Comparison of the CO<sub>2</sub> Adsorption Capacities of Adsorbents

| Samples                 | amine   | temperature (°C) | CO <sub>2</sub> concentration | adsorption capacities (mmol/g) | Amine efficiency (molCO <sub>2</sub> /molN) | reference |
|-------------------------|---------|------------------|-------------------------------|--------------------------------|---------------------------------------------|-----------|
| 4.0gPEI70K @polyHIPE    | PEI70K  | 20               | 10%                           | 4.18(wet)                      | 0.46                                        | This work |
|                         |         | 60               |                               | 2.35(dry)                      | 0.26                                        |           |
| polyHIPE-50%PEI70K      | PEI70K  | 60               | 10%                           | 2.09(dry)                      | 0.21                                        | This work |
| Monolithic Alumina      | PEI800  | 30               | 400ppm                        | 0.75(dry)                      | -                                           | 1         |
| MCM-41                  | PEI600  | 75               | 15%                           | 2.02(dry)                      | 0.17                                        | 2         |
|                         |         |                  |                               | 2.97(wet)                      | 0.2                                         |           |
| MCM-41                  | TEPA    | 35               | 10%                           | 2.70(dry)                      | 0.21                                        | 3         |
|                         | PEI600  |                  |                               | 1.60(dry)                      | 0.13                                        |           |
| PMMA                    | PEI1800 | 45               | 10%                           | 1.30(dry)                      | 0.11                                        | 4         |
|                         |         |                  |                               | PEI423                         | 2.40(dry)                                   |           |
| porous silica monoliths | PEI600  | 75               | 100%                          | 3.53(wet)                      | 0.47                                        | 5         |
|                         |         |                  |                               | 2.44(dry)                      | 0.21                                        |           |

|                   |        |     |        |           |      |    |
|-------------------|--------|-----|--------|-----------|------|----|
|                   |        | 25  |        | 1.00(dry) | 0.09 |    |
| Nanoporous carbon | PEI600 | 75  | 100%   | 1.01(dry) | 0.13 | 6  |
|                   |        |     | 10%    | 0.23(dry) | 0.03 |    |
| AC                | MDEA   | 50  | 20%    | 0.58(dry) | 0.26 | 7  |
|                   |        |     |        | 1.70(wet) | 0.76 |    |
| PAF-5             | PEI800 | 40  | 15%    | 2.52      | 0.19 | 8  |
| SBA-15            | TEPA   | 75  | 100%   | 3.93(dry) | 0.3  | 9  |
| SBA-15            | PEI423 | 75  | 15%    | 2.38(dry) | 0.21 | 10 |
| ZSM-5             | TEPA   | 100 | 10%    | 1.49(dry) | 0.29 | 11 |
| ZSM-5             | PEI    | 120 | 100%   | 1.80(dry) | -    | 12 |
| MIL-101           | TEPA   | 25  | 100%   | 3.5(dry)  | 0.38 | 13 |
| ZIF-8             | PEI    | 65  | 50%    | 1.99(wet) | -    | 14 |
| ZIF-8             | PEI800 | 25  | 100%   | 0.90(dry) | 0.05 | 15 |
|                   |        |     |        | 0.90(wet) |      |    |
| $\gamma$ -alumina | PEI600 | 25  | 10%    | 1.73(dry) | 0.20 | 16 |
|                   |        |     | 400ppm | 1.33(dry) | 0.15 |    |
| PD-M              | PEI    | 25  | 10%    | 1.21(dry) | 0.09 | 17 |
|                   |        |     |        | 1.96(wet) | 0.15 |    |

Table S3. CO<sub>2</sub> Adsorption capacities of 4.0PEI<sub>y</sub>@polyHIPE under 10% CO<sub>2</sub> in N<sub>2</sub> at 60 °C in fixed bed.

| Sample              | C/%   | H/%  | N/%   | CO <sub>2</sub> adsorption capacity (mmol/g) |
|---------------------|-------|------|-------|----------------------------------------------|
| 4.0PEI600@polyHIPE  | 55.28 | 9.45 | 11.77 | 2.16                                         |
| 4.0PEI1800@polyHIPE | 57.65 | 9.87 | 12.80 | 2.26                                         |
| 4.0PEI10K@polyHIPE  | 58.72 | 9.59 | 11.23 | 2.17                                         |

**References:**

- 1 M. A. Sakwa-Novak, C. J. Yoo, S. Tan, F. Rashidi and C. W. Jones, *ChemSusChem*, 2016, **9**, 1859–1868.
- 2 X. Xu, C. Song, B. G. Miller and A. W. Scaroni, *Ind. Eng. Chem. Res.*, 2005, **44**, 8113–8119.
- 3 Z. L. Liu, Y. Teng, K. Zhang, Y. Cao and W. P. Pan, *Ranliao Huaxue Xuebao/Journal Fuel Chem. Technol.*, 2013, **41**, 469–476.
- 4 M. L. Gray, J. S. Hoffman, D. C. Hreha, D. J. Fauth, S. W. Hedges, K. J. Champagne and H. W. Pennline, *Energy and Fuels*, 2009, **23**, 4840–4844.
- 5 X. Guo, L. Ding, K. Kanamori, K. Nakanishi and H. Yang, *Microporous Mesoporous Mater.*, 2017, **245**, 51–57.
- 6 Z. Tang, Z. Han, G. Yang and J. Yang, *Appl. Surf. Sci.*, 2013, **277**, 47–52.
- 7 A. Gholidoust, J. D. Atkinson and Z. Hashisho, *Energy and Fuels*, 2017, **31**, 1756–1763.
- 8 S. Sung and M. P. Suh, *J. Mater. Chem. A*, 2014, **2**, 13245–13249.
- 9 M. B. Yue, Y. Chun, Y. Cao, X. Dong and J. H. Zhu, *Adv. Funct. Mater.*, 2006, **16**, 1717–1722.
- 10 X. Yan, L. Zhang, Y. Zhang, G. Yang and Z. Yan, *Ind. Eng. Chem. Res.*, 2011, **50**, 3220–3226.
- 11 Y. Wang, T. Du, Y. Song, S. Che, X. Fang and L. Zhou, *Solid State Sci.*, 2017, **73**, 27–35.

- 12 Y. Wang, T. Du, Z. Qiu, Y. Song, S. Che and X. Fang, *Mater. Chem. Phys.*, 2018, **207**, 105–113.
- 13 H. C. Yoon, P. B. S. Rallapalli, H. T. Beum, S. S. Han and J. N. Kim, *Energy and Fuels*, 2018, **32**, 1365–1373.
- 14 S. Xian, F. Xu, C. Ma, Y. Wu, Q. Xia, H. Wang and Z. Li, *Chem. Eng. J.*, 2015, **280**, 363–369.
- 15 J. Pokhrel, N. Bhorla, S. Anastasiou, T. Tsoufis, D. Gournis, G. Romanos and G. N. Karanikolos, *Microporous Mesoporous Mater.*, 2018, **267**, 53–67.
- 16 W. Chaikittisilp, H. J. Kim and C. W. Jones, *Energy and Fuels*, 2011, **25**, 5528–5537.
- 17 H. Thakkar, S. Eastman, A. Al-Mamoori, A. Hajari, A. A. Rownaghi and F. Rezaei, *ACS Appl. Mater. Interfaces*, 2017, **9**, 7489–7498.
